# Supplementary material
Source: publisher figshare collection journal article supplement (https://adisjournals.figshare.com/ndownloader/files/31701338)

# Concomitant iGlarLixi and Sodium-Glucose Co-transporter-2 Inhibitor Therapy in Adults with Type 2 Diabetes: LixiLan-G Trial and Real-World Evidence Results

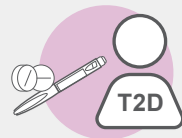

## Authors:

Cristian Guja<sup>1</sup>, Francesco Giorgino<sup>2</sup>, Lawrence Blonde<sup>3</sup>, Amar Ali<sup>4</sup>, Martin Prázný<sup>5</sup>, Juris J. Meier<sup>6</sup>, Elisabeth Souhani<sup>7</sup>, Robert Lubwama<sup>8</sup>, Chen Ji<sup>9</sup>, Julio Rosenstock<sup>10</sup>

## Affiliations:

<sup>1</sup>Department of Diabetes, Nutrition and Metabolic Diseases, Carol Davila University of Medicine and Pharmacy, Bucharest, Romania; <sup>2</sup>Department of Emergency and Organ Transplantation, Section of Internal Medicine, Endocrinology, Andrology and Metabolic Diseases, University of Bari Aldo Moro, Bari, Italy; <sup>3</sup>Frank Riddick Diabetes Institute, Department of Endocrinology, Ochsner Medical Center, New Orleans, LA, USA; <sup>4</sup>Oakenhurst Medical Practice, Blackburn, UK; <sup>5</sup>Department of Internal Medicine, 1<sup>st</sup> Faculty of Medicine, Charles University in Prague, Prague, Czech Republic; <sup>6</sup>Diabetes Division, St Josef Hospital, Ruhr-University Bochum, Bochum, Germany; <sup>7</sup>Sanofi, Paris, France; <sup>8</sup>Sanofi, Bridgewater, NJ, USA; <sup>9</sup>Sanofi, Beijing, China; <sup>10</sup>Dallas Diabetes Research Center at Medical City, Dallas, TX, USA

## Introduction

## Study design

## Key results

## Conclusions

## Introduction

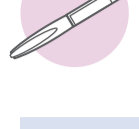

**iGlarLixi** is a once-daily fixed-ratio combination of insulin glargine 100 U/mL (iGlar) and the glucagon-like peptide 1 receptor agonist (GLP-1 RA) lixisenatide (Lixi) that robustly improves glycaemic control in adults with T2D irrespective of previous treatment (oral antihyperglycaemic drugs [OADs], basal insulin or GLP-1 RAs)

## Objective

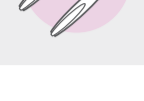

To assess the effects of **concomitant iGlarLixi and SGLT2i** therapy in a post hoc exploratory analysis of the LixiLan-G randomised controlled trial (RCT) and a retrospective, observational (real-world evidence [RWE]) cohort study

## Study design

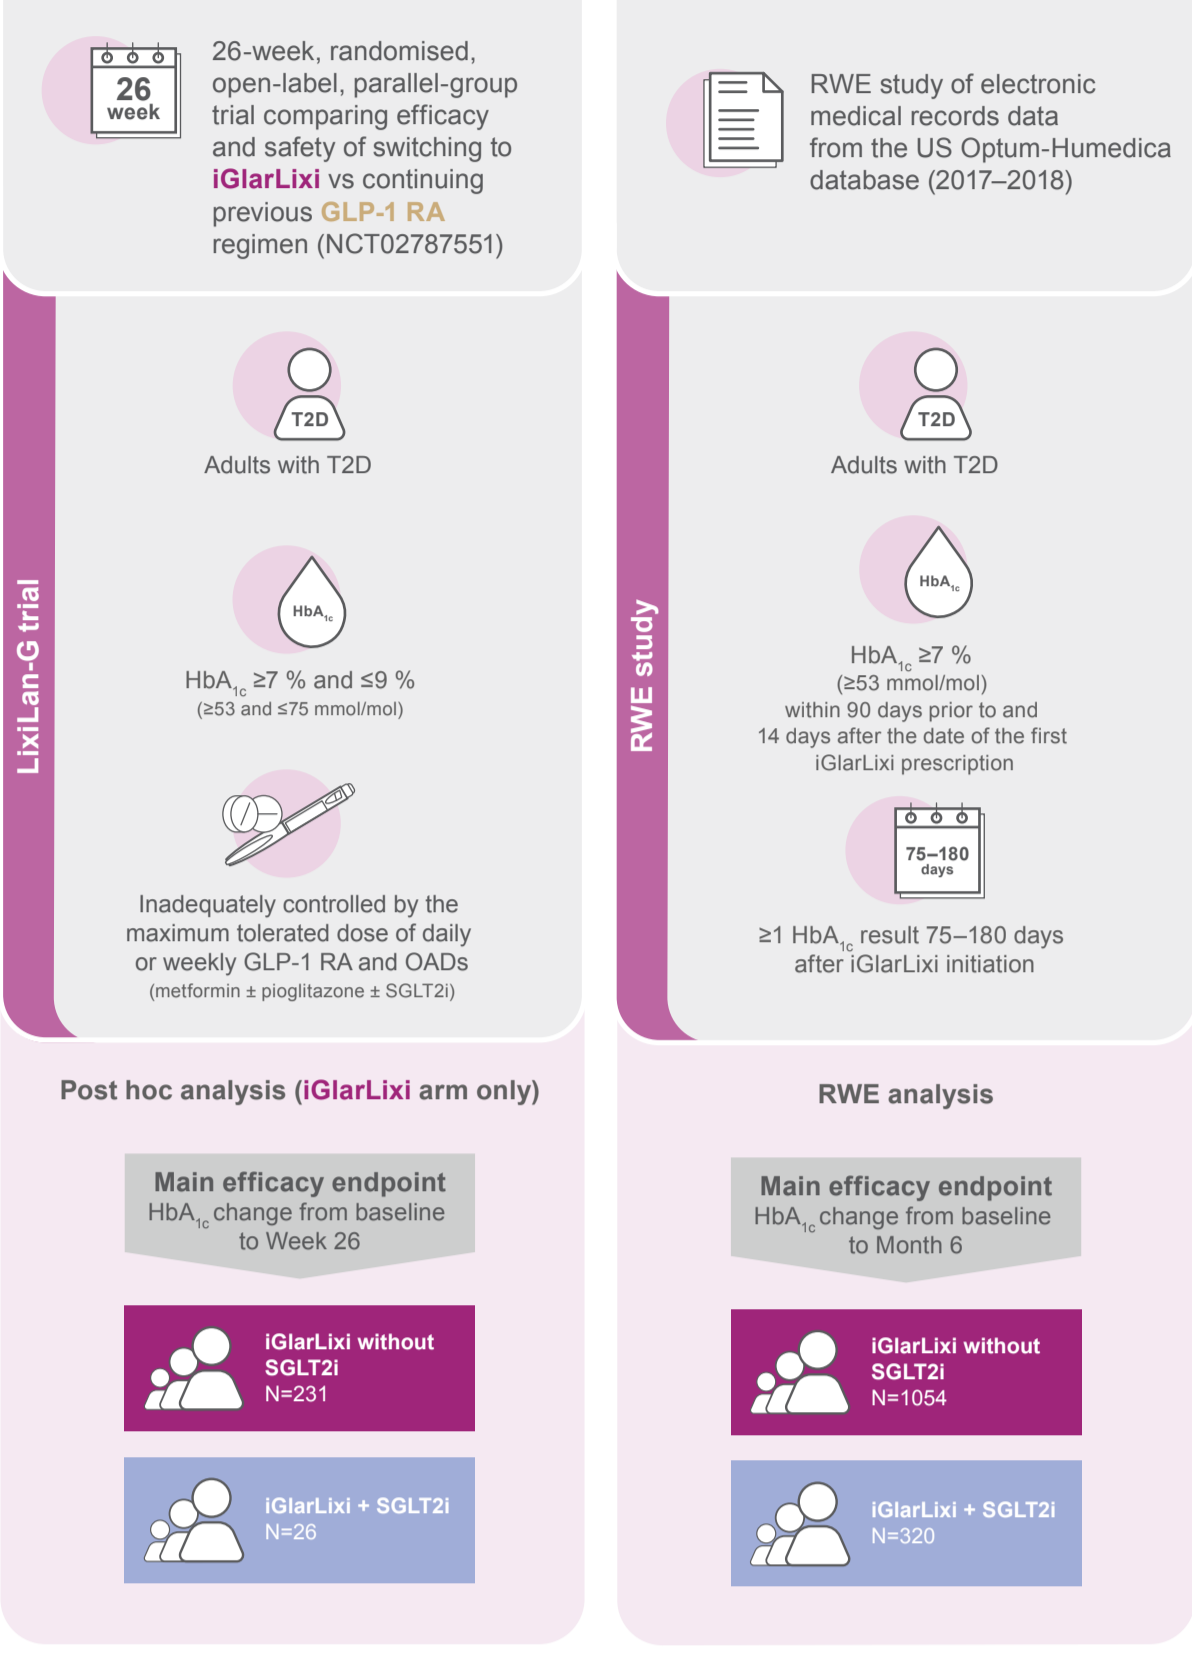

## Key results

### Baseline characteristics

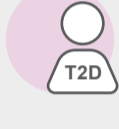

In both studies, there were no major differences in baseline characteristics for those who initiated **iGlarLixi** while already using SGLT2i and those initiating **iGlarLixi** without concomitant SGLT2i therapy

### Efficacy

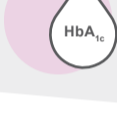

**HbA<sub>1c</sub> changes were similar between SGLT2i users and non-users**

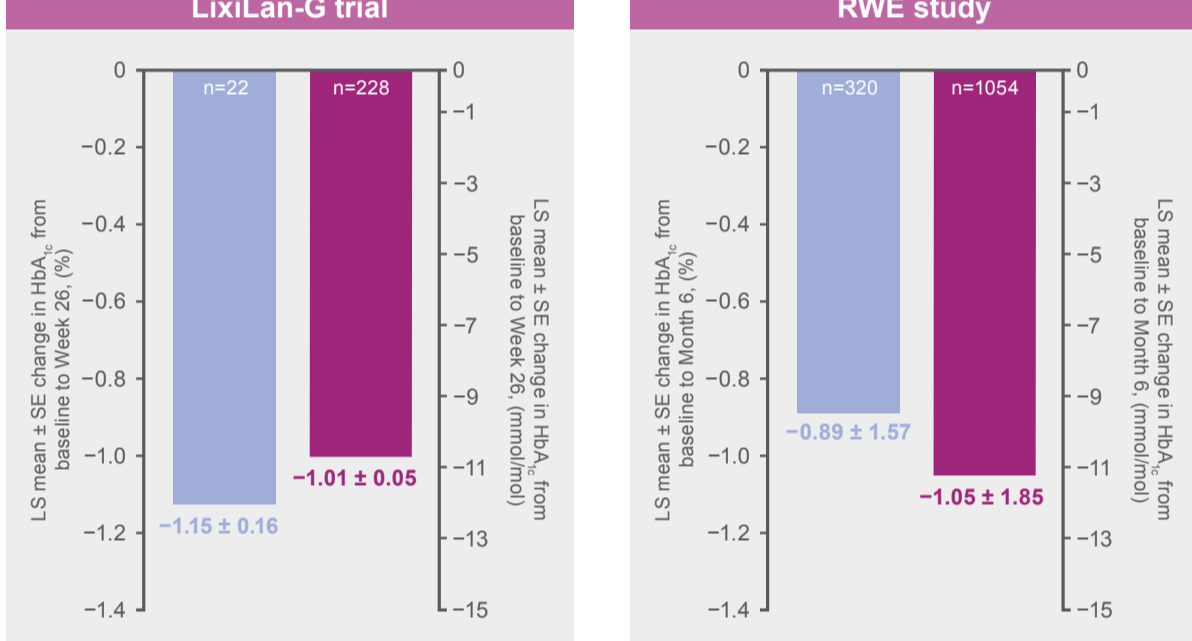

**Other efficacy endpoints were generally similar between SGLT2i users and non-users in the LixiLan-G trial post hoc analysis**

|                 | LS mean (SE) change from baseline to Week 26 | iGlarLixi + SGLT2i | iGlarLixi without SGLT2i |
|-----------------|----------------------------------------------|--------------------|--------------------------|
| LixiLan-G trial | FPG, mmol/L                                  | -2.83 (0.39)       | -2.22 (0.13)             |
|                 | 2-hour PPG, mmol/L                           | -5.04 (0.67)       | -3.83 (0.22)             |
|                 | Body weight, kg                              | 2.41 (0.6)         | 1.9 (0.2)                |

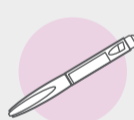

At Week 26, there was no difference in mean daily **iGlarLixi** dose between SGLT2i users and non-users in the LixiLan-G trial post hoc analysis

### Safety

**Prevalence and rates of hypoglycaemia were similar between SGLT2i users and non-users**

|                 |                                    | Documented symptomatic hypoglycaemia (≤3.9 mmol/L [≤70 mg/dL]) |                          | Severe hypoglycaemia* |                          |
|-----------------|------------------------------------|----------------------------------------------------------------|--------------------------|-----------------------|--------------------------|
|                 |                                    | iGlarLixi + SGLT2i                                             | iGlarLixi without SGLT2i | iGlarLixi + SGLT2i    | iGlarLixi without SGLT2i |
| LixiLan-G trial | % of participants (26-week period) | 24.0%                                                          | 28.3%                    | 0%                    | 0.4%                     |
|                 | Events PPY (26-week period)        | 0.72                                                           | 1.62                     | 0                     | <0.01                    |

\*Event requiring assistance of another person to actively administer carbohydrate, glucagon or other resuscitative actions

|           |                                    | Any hypoglycaemia  |                          | Hypoglycaemia events associated with an inpatient or ED visit |                          |
|-----------|------------------------------------|--------------------|--------------------------|---------------------------------------------------------------|--------------------------|
|           |                                    | iGlarLixi + SGLT2i | iGlarLixi without SGLT2i | iGlarLixi + SGLT2i                                            | iGlarLixi without SGLT2i |
| RWE study | % of participants (6-month period) | 7.5%               | 6.7%                     | 1.3%                                                          | 1.9%                     |
|           | Events PPY (6-month period)        | 0.26               | 0.24                     | 0.05                                                          | 0.05                     |

**Other safety endpoints were similar between SGLT2i users and non-users from baseline to Week 26/Month 6**

|                 |                                                                               | iGlarLixi + SGLT2i | iGlarLixi without SGLT2i |
|-----------------|-------------------------------------------------------------------------------|--------------------|--------------------------|
| LixiLan-G trial | Participants with ≥1 TEAE, n (%)                                              | 14 (56.0)          | 149 (64.8)               |
|                 | Participants with TEAEs leading to permanent treatment discontinuation, n (%) | 0 (0)              | 9 (3.9)                  |
| RWE study       | Diabetic ketoacidosis, n (%)                                                  | 1 (0.3)            | 2 (0.2)                  |
|                 | Acute kidney injury, n (%)                                                    | 0 (0)              | 0 (0)                    |
|                 | Urinary tract infections, n (%)                                               | 1 (0.3)            | 6 (0.6)                  |

## Conclusions

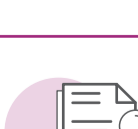

Results from an RCT and a real-world clinical setting showed that **iGlarLixi** provided similar robust glycaemic control and comparably low risk of hypoglycaemia in people with T2D regardless of concomitant use of SGLT2i

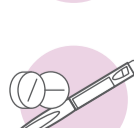

This evidence supports the combined use of **iGlarLixi** and SGLT2i in the treatment of people with T2D

### Abbreviations

ED, emergency department; FPG, fasting plasma glucose; GLP-1 RA, glucagon-like peptide 1 receptor agonist; HbA<sub>1c</sub>, glycated haemoglobin; iGlar, insulin glargine 100 U/mL; Lixi, lixisenatide; LS, least squares; OAD, oral antihyperglycaemic drug; PPG, post-prandial plasma glucose; PPY, per participant-year; RCT, randomised controlled trial; RWE, real-world evidence; SD, standard deviation; SE, standard error; SGLT2i, sodium-glucose co-transporter-2 inhibitor; T2D, type 2 diabetes; TEAE, treatment-emergent adverse event.

The infographic represents the opinions of the authors. For a full list of declarations, including funding and author disclosure statements, please see the full text online. © The authors, CC-BY-NC 2021. [Full manuscript](#)

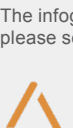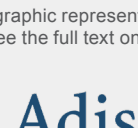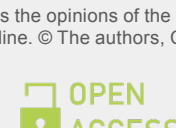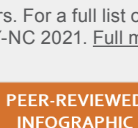

Supplement: Supplementary file 1 [file 31701338]
